# Supplementary material for: Efficient Production of 2,5-Diketo-D-gluconic Acid by Reducing Browning Levels During Gluconobacter oxydans ATCC 9937 Fermentation
Source: Front Bioeng Biotechnol. 2022 Jul 8;10:918277. doi: 10.3389/fbioe.2022.918277 (PMC9304662; doi:10.3389/fbioe.2022.918277)
Supplement: Supplementary file 1 [file Table2.XLSX]

## Sheet: Sheet1
		Table1 Comparing 2,5-DKG production in different strains.													Table2 Standard 2,5-DKG curve
			2,5-DKG production				OD600								concentration of 2,5-DKG (g/L)	the peak area of 2,5-DKG
		P. putida ATCC 21813	1	0.8	1.1		13.25	14.27	15.12						0	0
		P. putida KT2440	1.2	1	1.4		12.58	13.21	11.74						0.49	90548
		G. oxydans ATCC9937	21.8032	20.7561	22.2214		5.67	4.35	5.87						1.425	263633
		T. citrea CICC10802	23.5358	22.4587	23.0414		9.85	10.21	10.87						3.165	594866
		T. citrea CICC10802	18.8694	19.5482	21.0245		9.78	8.83	10.12						5.267	944424
	Table 3 Consumption and formation of D-gluconic acid, 2-KG, 2,5-DKG, and 5-KG by G. oxydans ATCC 9937
		Time (h)	GA			2-KDGH			2,5-DKG
		0	0	0	0	0	0	0	0	0	0
		6	11.1758	10.5895	10.0046	0.45	0.41	0.52772	0.42804	0.43256	0.44552
		12	25.2858	24.2554	23.1258	2.39438	2.10358	1.40098	0.74262	0.76254	0.76599
		18	53.9762	51.7564	50.5458	4.32073	3.25648	2.43034	1.60911	1.60254	1.62827
		24	72.3787	72.22564	73.5428	7.30246	4.6814	4.56149	2.74567	2.56855	2.35895
		30	55.7952	57.55415	58.5247	20.8376	22.1259	23.9515	5.53235	4.93876	4.54263
		36	34.4351	36.12554	36.4157	32.6036	36.2549	38.0078	8.51797	7.25486	6.62919
		42	15.0364	14.25689	13.5345	39.246	41.2586	42.8115	11.2432	9.5689	8.59392
		48	4.99646	4.25871	3.25789	37.0169	36.8957	40.724	13.7424	13.5569	14.5186
		54	1.75762	1.575243	1.45824	26.4017	25.2658	23.2135	16.4063	17.0063	17.9835
		60	1.4594	1.40258	1.39875	17.2971	15.8566	15.1117	22.5341	21.2569	20.0963
		66	1.43824	1.45862	1.48579	7.19758	7.02568	6.42278	18.6786	17.2569	16.6925
		72	1.90521	1.75358	1.58754	1.87896	1.58954	1.67272	16.1071	15.9533	15.3345
		78	2.91613	2.36545	1.52457	0.28257	0.23565	0.2574	15.9262	15.5682	15.2819
		84							13.6577	13.5266	12.8783
				Table 4 Illusion rate of various substances
					D-glucose to GA	76.4	74.65	75.5
					GA to -2-KG	61.32	64.5	62.82
					2-KG to 2,5-DKG	44.98	39.04	40.27
			Table 5 Changes in 2-KG concentrations after kgdSLC knockout and overexpression
	WT			overexpression kgdL			kgdL knockout			kgdS knockout			kgdC knockout			kgdSLC knockout
0	0	0	0	0	0	0	0	0	0	0	0	0	0	0	0	0	0	0
12	20.7211	20.3591	20.4256	20.5896	20.6587	20.5561	25.1262	25.5234	24.9586	20.9876	25.5246	20.6456	25.2574	25.4569	25.2146	25.3525	25.8746	25.3566
24	15.6887	20.0498	19.5682	15.3587	15.1549	15.1453	45.2848	50.0762	48.2561	40.6256	45.5314	45.8658	45.6053	50.6968	46.2599	50.0563	45.0589	46.8957
36	10.5758	15.0468	13.5681	10.2549	10.0255	10.8625	50.0408	50.7466	50.3255	45.8434	50.3578	50.0248	50.4986	55.6322	51.9587	50.924	45.5998	49.5689
48	5.6739	5.8218	5.99561	5.58756	5.62145	5.25868	50.9694	55.306	54.2568	50.7439	55.3387	52.2155	50.9904	60.554	55.2546	55.9017	60.5581	58.359
60	2.5371	2.5	2.48	2.55252	2.52452	2.35624	55.974	60.3205	58.2035	55.5663	60.3275	58.2565	60.1539	65.2022	61.2358	60.5091	55.241	60.0257
72	1.5	4	3.8	1	1.5	1.2	70.8461	70.8005	70.2569	70.9526	75.0878	71.2549	70.846	70.7869	70.2146	70.9267	70.9207	70.8565
108	3.5	1	2.6	2.5	2	1.9	70.6525	70.9193	70.5532	70.7928	75.1262	81.5875	70.9792	70.9734	70.8652	70.8643	75.0958	70.1547
120	0.5	0.6	0.5	0.6	0.25	0.5	70.9798	70.9916	70.9987	75.1042	75.2025	75.1566	75.055	75.0228	75.1024	75.043	75.087	75.1055
132	0.2	0.5	0.3	0.3	0.25	0.3	75.1272	75.1104	75.1576	75.2741	75.3367	75.1987	75.1185	75.0339	75.1656	75.196	75.2439	75.2125
156	0.1	0.8	0.3	0.2	0.24	0.2	70.9887	75.0324	75.1256	75.1578	75.4711	75.3598	75.0562	75.2745	75.2026	75.0477	75.3698	75.1223
		Table 6 Concentration of 2,5-DKG and absorbance at 420 nm in fermentation broth
		Time	concentration			OD420
		0	0	0	0	1.22	1.12	1.15
		12	0.74262	0.76599	0.75894	1.46	1.66	1.85
		24	2.74567	2.35895	2.55651	3.63	3.28	3.55
		36	8.51797	6.62919	6.95684	4.56	4.92	4.76
		48	13.7424	14.5186	14.2569	6.26	6.72	6.58
		60	22.5341	20.0963	20.2547	8.38	8.85	8.48
		72	16.1071	15.3345	15.4257	10.34	10.95	11.02
			Table 7 2,5-DKG concentration and absorbance at 420 nm in broth plus glutamine
			OD420						concentation
		Time	plus glutamine			control			plus glutamine			control
		0	4.49	4.32	4.35	4.36	4.38	1.36	14.5186	14.5045	14.5146	14.5186	14.5248	14.5565
		24	5.74	5.63	5.8	5.65	5.87	5.25	12.9835	12.0446	12.5526	13.7835	13.6587	13.5565
		48	9.62	9.98	9.86	6.75	7.16	7.05	10.0963	9.86785	9.95868	12.0963	11.8545	11.9587
		72	12.14	12.99	12.58	8.11	8.51	8.28	8.59392	8.35879	8.35894	10.6925	10.5845	10.5947
		96	16.92	17.357	17.12	9.59	9.95	9.76	6.54263	6.42585	6.58947	9.33454	8.98574	9.25684
		126	23.38	23.797	23.22	12.54	13.01	12.95	4.54263	4.25846	4.25684	8.28186	7.85485	8.11567
		150	27.03	28.328	28.14	14.83	15.22	14.81	1.62827	1.25457	1.45623	6.87826	6.58754	6.59764
			Table 8 2,5-DKG concentration and absorbance at 420 nm in broth plus browning inhibitor
			OD420									concentration
		Time	control			sodium sulfite			potassium sulfite			control			sodium sulfite			potassium sulfite
		0	4.1	5.17	4.9	4.67	5.12	4.78	4.35	5.23	4.8	14.5186	14.5248	14.5214	0	0	0	0	0	0
		24	8.4	7.71	7.7	5.12	5.18	5.11	5.12	5.48	5.21	13.7835	13.6587	13.7957	0	0	0	0	0	0
		48	11.6	9.85	9.56	5.24	5.21	5.2	5.01	5.65	5.55	12.0963	11.8545	11.9026	0	0	0	0	0	0
		72	12.74	11.13	11.55	5.32	5.36	5.32	6.21	6.35	6.25	10.6925	10.5845	10.6026	0	0	0	0	0	0
		96	15.78	14.85	15.22	6.58	6.61	6.6	5.98	6.23	6.32	9.33454	8.98574	9.65846	0	0	0	0	0	0
		120	18.21	17.46	19.31	6.72	6.98	6.9	6.4	6.68	6.52	8.28186	7.85485	8.02564	0	0	0	0	0	0
				Table 9 G. oxydans ATCC9937 growth curve at different D-glucose concentrations
			Time	5g/L			10g/L			15g/L			20g/L			25g/L
			0	0	0	0	0	0	0	0	0	0	0	0	0	0	0	0
			4	0.081	0.082	0.081	0.06	0.073	0.069	0.071	0.081	0.079	0.076	0.081	0.081	0.025	0.038	0.21
			8	0.218	0.289	0.256	0.146	0.206	0.185	0.124	0.19	0.158	0.325	0.425	0.395	0.298	0.358	0.296
			12	1.327	1.408	1.095	1.023	1.357	1.311	0.987	1.29	1.02	1.926	2.008	2.001	1.578	1.572	1569
			16	1.538	1.528	1.519	1.847	1.92	1.9	1.936	2.094	2.012	2.182	2.486	2.268	2.069	2.151	2.11
			20	1.549	1.57	1.556	1.924	1.957	1.988	2.243	2.305	2.158	2.346	2.664	2.568	2.307	2.339	2.226
			24	1.495	1.555	1.529	2.007	2.009	2.004	2.321	2.4	2.155	2.561	2.786	2.561	2.686	2.316	2.532
			28	1.661	1.603	1.636	2.06	2.056	2.045	2.435	2.501	12.457	3.226	3.332	3.295	3.176	3.222	3.15
			32	1.612	1.612	1.625	2.069	2.038	2.075	2.479	2.551	2.502	3.384	3.56	3.512	3.166	3.262	3.255
		Table 10 Time course of 2,5-DKG production using different feeding methods
		Time	control			constant-rate feeding mode			single-dose feed-batch mode
		0	0	0	0	0	0	0	0	0	0
		4	0.1	0.09	0.1	0.061	0	0.02	0.09	0	0
		8	0.2	0.15	0.18	0.119	0.23	0.19	0.115	0.21	0.19
		12	0.8	0.67	0.72	0.849	0.789	1.821	0.678	0.549	0.599
		16	1.8	1.56	1.65	2.9	2.75	2.81	2.6	2.58	2.601
		20	2.8	2.35	268	3.9	3.73	3.79	3.96	3.76	3.865
		24	2.86	2.72	2.8	4.4	4.52	4.49	3.9	4.21	4.124
		28	2.92	2.99	2.9	4.53	4.38	4.4	4.12	4	4.021
		32	3.01	3.25	3.25	4.64	4.25	4.51	4.28	4.18	4.191
		36	3.36	3.18	3.26	4.57	4.6	4.5	4.55	4.49	4.51
		40	3.36	3.48	3.45	4.45	4.52	4.56	4.59	4.65	4.61
		44	3.4	3.55	3.5	4.47	4.44	4.47	4.63	4.42	4.58
		48	3.6	3.69	3.65	4.63	4.58	4.53	5.12	5	5.01
		52	3	3.21	3.19	4.85	4.73	4.75	5.07	4.98	4.98
				Table 11 Time course of 2,5-DKG production using different feeding methods
				Time	control			constant-rate feeding mode			single-dose feed-batch mode
				0	0	0	0	0	0	0	0	0	0
				4	0.42804	0.44552	0.43589	0.12	0.11	0.12	0.11	0.15	0.14
				8	0.64262	0.66599	0.65897	0.65	0.79	0.69	0.56	0.61	0.58
				12	0.74262	0.76599	0.76854	0.61651	0.87796	0.79854	0.59593	0.58965	0.5968
				16	1.74567	1.35895	1.56896	10.7703	9.58964	10.2598	9.07331	9.45764	9.41257
				20	2.23235	2.04263	2.08954	13.4674	14.5865	14.5485	12.732	13.5784	13.0255
				24	2.74567	2.35895	2.54715	16.9944	16.8759	16.7899	15.5056	16.5484	16.2564
				28	5.24319	5.59392	5.36958	19.0354	18.9857	18.8856	19.8238	19.588	24.1426
				32	6.74245	6.51863	6.58794	24.4987	25.5895	25.258	23.7192	24.1549	24.2203
				36	8.51797	6.62919	7.52314	29.6909	28.9986	29.5894	27.3119	26.5789	26.9855
				40	11.5341	10.0963	10.5653	35.9636	35.0125	35.6589	37.4077	38.1245	39.5879
				44	12.6786	13.6925	12.8987	43.8529	42.8986	43.5575	44.7409	45.6755	44.9857
				48	13.7424	14.5186	14.1258	49.6904	49.8666	49.6986	50.8126	51.1026	50.9897
				52	15.9262	15.2819	15.3659	48.9966	47.5486	48.8997	49.0025	48.6582	48.9856
				56	18.5236	17.3659	17.8959
				60	22.5341	20.0963	21.2547
				64	17.3569	17.6897	17.459
